# Supplementary material for: Summertime tropospheric ozone source apportionment study in the Madrid region (Spain)
Source: Copernicus journal article supplement (doi:10.5194/acp-24-4949-2024), 2024-04-29
Supplement: Supplementary file [file acp-24-4949-2024-supplement.pdf]

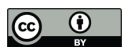

*Supplement of*

## **Summertime tropospheric ozone source apportionment study in the Madrid region (Spain)**

**David de la Paz et al.**

*Correspondence to:* Rafael Borge ([rafael.borge@upm.es](mailto:rafael.borge@upm.es))

The copyright of individual parts of the supplement might differ from the article licence.

**Table S1. WRF model physics options and parametrizations.**

| <b>Option</b>           | <b>Setup</b>               |
|-------------------------|----------------------------|
| Initialization          | GFS                        |
| Shortwave radiation     | Dudhia scheme              |
| Longwave radiation      | GFDL                       |
| Land-surface model      | Noah LSM                   |
| Microphysics scheme     | WSM 6-class Graupel scheme |
| PBL Scheme              | YSU scheme                 |
| Surface Layer option    | Monin-Obukhov              |
| Cumulus Parametrization | No                         |
| Nudging                 | Yes                        |

The WRF model was initialized from global reanalysis made available by NCEP (National Centers for Environmental Prediction) from outputs of the GFS (Global Forecast System) (ds083.0). They have a spatial resolution of 1° x 1° and a temporal resolution of 6 hours ((00Z, 06Z, 12Z, 18Z). Data assimilation was applied (via nudging excluding the planetary boundary layer) for a more realistic representation of meteorological fields using both, surface observations from NCEP ADP Global Surface Observational Weather Data (ds461.0) and vertical soundings from NCEP ADP Global Upper Air Observational Weather Data (ds351.0).

References:

- National Centers for Environmental Prediction/National Weather Service/NOAA/U.S. Department of Commerce. 2004, updated daily. NCEP ADP Global Surface Observational Weather Data, October 1999 - continuing. Research Data Archive at the National Center for Atmospheric Research, Computational and Information Systems Laboratory. <https://doi.org/10.5065/4F4P-E398>. Accessed 27 January 2016
- National Centers for Environmental Prediction/National Weather Service/NOAA/U.S. Department of Commerce. 2004, updated daily. NCEP ADP Global Surface Observational Weather Data, October 1999 - continuing. Research Data Archive at the National Center for Atmospheric Research, Computational and Information Systems Laboratory. <https://doi.org/10.5065/4F4P-E398>. Accessed 27 January 2016
- Satellite Services Division/Office of Satellite Data Processing and Distribution/NESDIS/NOAA/U.S. Department of Commerce, and National Centers for Environmental Prediction/National Weather Service/NOAA/U.S. Department of Commerce. 2004, updated daily. NCEP ADP Global Upper Air Observational Weather Data, October 1999 - continuing. Research Data Archive at the National Center for Atmospheric Research, Computational and Information Systems Laboratory. <https://doi.org/10.5065/39C5-Z211>. Accessed 25 January 2016.

**Table S2. Horizontal dimensions and resolution of WRF and CMAQ modeling domains.**

| <b>Domains</b> | <b>Geographic area</b> | <b>WRF X-Y dimensions (grid cells)</b> | <b>CMAQ X-Y dimensions (grid cells)</b> | <b>Horizontal resolution (km)</b> |
|----------------|------------------------|----------------------------------------|-----------------------------------------|-----------------------------------|
| D1             | Europe                 | 560 x 496                              | 459 x 406                               | 12                                |
| D2             | Iberian Peninsula      | 384 x 312                              | 300 x 240                               | 4                                 |
| D3             | Greater Madrid area    | 256 x 256                              | 136 x 144                               | 1                                 |

**Table S3. Model performance statistics (dimensionless unless noted otherwise) by station for ground-level O<sub>3</sub> concentration.**

| STATION               | TYPE           | FAC2 | MB<br>( $\mu\text{g m}^{-3}$ ) | MGE<br>( $\mu\text{g m}^{-3}$ ) | NMB   | NMGE | RMSE<br>( $\mu\text{g m}^{-3}$ ) | r    | IOA  |
|-----------------------|----------------|------|--------------------------------|---------------------------------|-------|------|----------------------------------|------|------|
| Arganda del Rey       | Industrial     | 0.96 | 5.8                            | 14.6                            | 0.07  | 0.17 | 18.6                             | 0.84 | 0.72 |
| Fuenlabrada           | Industrial     | 0.95 | 9.8                            | 14.4                            | 0.13  | 0.19 | 18.7                             | 0.84 | 0.69 |
| Villa del Prado       | Rural          | 0.99 | -0.8                           | 11.8                            | -0.01 | 0.13 | 15.3                             | 0.82 | 0.72 |
| S.Mde Valdeiglesias   | Rural          | 1.00 | 0.0                            | 10.5                            | 0.00  | 0.11 | 13.7                             | 0.80 | 0.71 |
| Orusco de Tajuña      | Rural          | 1.00 | -10.0                          | 12.7                            | -0.10 | 0.12 | 16.1                             | 0.84 | 0.66 |
| Guadalix de la sierra | Rural          | 0.92 | 7.6                            | 17.9                            | 0.09  | 0.21 | 22.7                             | 0.79 | 0.67 |
| El Atazar             | Rural          | 0.99 | -11.2                          | 16.1                            | -0.11 | 0.15 | 20.7                             | 0.69 | 0.58 |
| Algete                | Suburban       | 1.00 | -4.4                           | 13.1                            | -0.05 | 0.14 | 17.1                             | 0.81 | 0.72 |
| La Sagra              | Suburban       | 0.94 | 7.3                            | 14.5                            | 0.09  | 0.18 | 20.0                             | 0.81 | 0.71 |
| Mostoles              | Suburban       | 0.94 | 8.0                            | 15.5                            | 0.10  | 0.19 | 20.6                             | 0.83 | 0.71 |
| Majadahonda           | Suburban       | 0.96 | -2.7                           | 15.7                            | -0.03 | 0.17 | 21.4                             | 0.81 | 0.71 |
| Valdemoro             | Suburban       | 0.91 | 6.7                            | 16.0                            | 0.08  | 0.19 | 22.1                             | 0.80 | 0.71 |
| Rivas Vaciamadrid     | Suburban       | 0.91 | 7.0                            | 17.3                            | 0.09  | 0.21 | 23.0                             | 0.81 | 0.70 |
| Torrejon de Ardoz     | Suburban       | 0.90 | 10.1                           | 17.6                            | 0.13  | 0.22 | 23.7                             | 0.82 | 0.70 |
| Azuqu. de Henares     | Suburban       | 0.95 | 3.6                            | 16.8                            | 0.04  | 0.20 | 21.6                             | 0.78 | 0.70 |
| Toledo2               | Suburban       | 0.95 | -0.9                           | 16.3                            | -0.01 | 0.18 | 22.0                             | 0.72 | 0.68 |
| Aranjuez              | Suburban       | 0.91 | 9.3                            | 16.7                            | 0.11  | 0.20 | 22.5                             | 0.77 | 0.67 |
| El Pardo              | Suburban       | 0.92 | -0.2                           | 22.2                            | 0.00  | 0.24 | 28.0                             | 0.74 | 0.65 |
| Casa de campo         | Suburban       | 0.94 | 1.7                            | 20.1                            | 0.02  | 0.23 | 26.7                             | 0.61 | 0.63 |
| Juan Carlos I         | Suburban       | 0.90 | -4.6                           | 24.2                            | -0.05 | 0.27 | 31.0                             | 0.61 | 0.63 |
| Alcorcón              | Urb.Background | 0.96 | 4.8                            | 14.6                            | 0.06  | 0.18 | 19.7                             | 0.83 | 0.73 |
| Guadalajara           | Urb.Background | 0.94 | 7.4                            | 15.6                            | 0.09  | 0.19 | 21.4                             | 0.77 | 0.70 |
| Tres olivos           | Urb.Background | 0.92 | -4.0                           | 22.8                            | -0.04 | 0.25 | 29.2                             | 0.66 | 0.63 |
| Villaverde            | Urb.Background | 0.86 | 13.1                           | 22.2                            | 0.17  | 0.29 | 29.4                             | 0.66 | 0.61 |
| Farolillo             | Urb.Background | 0.88 | 5.8                            | 22.4                            | 0.07  | 0.27 | 29.7                             | 0.62 | 0.62 |
| Retiro                | Urb.Background | 0.86 | 11.9                           | 23.0                            | 0.16  | 0.31 | 29.3                             | 0.64 | 0.60 |
| Barajas pueblo        | Urb.Background | 0.81 | 11.2                           | 25.1                            | 0.15  | 0.33 | 32.2                             | 0.65 | 0.62 |
| Arturo Soria          | Urb.Background | 0.84 | 15.4                           | 23.2                            | 0.22  | 0.32 | 29.8                             | 0.63 | 0.57 |
| Ench de Vallecas      | Urb.Background | 0.88 | 6.2                            | 21.1                            | 0.07  | 0.25 | 27.9                             | 0.66 | 0.64 |
| Plaza del Carmen      | Urb.Background | 0.72 | 23.9                           | 29.9                            | 0.39  | 0.48 | 37.0                             | 0.59 | 0.47 |
| Segovia 2             | Traffic        | 0.97 | 3.5                            | 13.6                            | 0.04  | 0.16 | 17.0                             | 0.84 | 0.71 |
| Vill.de Salvanes      | Traffic        | 0.99 | 3.1                            | 10.6                            | 0.04  | 0.12 | 14.6                             | 0.78 | 0.71 |
| Colmenar Viejo        | Traffic        | 0.99 | -0.7                           | 13.0                            | -0.01 | 0.14 | 17.3                             | 0.78 | 0.69 |
| Alcobendas            | Traffic        | 0.93 | -0.8                           | 17.8                            | -0.01 | 0.20 | 23.6                             | 0.80 | 0.70 |
| Getafe                | Traffic        | 0.92 | 8.8                            | 16.8                            | 0.11  | 0.21 | 23.1                             | 0.80 | 0.70 |
| Alcala de Henares     | Traffic        | 0.87 | 10.0                           | 19.3                            | 0.13  | 0.24 | 25.0                             | 0.83 | 0.69 |
| Leganes               | Traffic        | 0.87 | 12.4                           | 18.4                            | 0.16  | 0.24 | 25.7                             | 0.79 | 0.67 |
| Barrio del Pilar      | Traffic        | 0.88 | 9.0                            | 20.8                            | 0.11  | 0.27 | 28.2                             | 0.64 | 0.62 |
| Coslada               | Traffic        | 0.79 | 18.9                           | 24.7                            | 0.27  | 0.35 | 31.2                             | 0.80 | 0.61 |
| Collado Villalba      | Traffic        | 0.78 | 19.3                           | 23.6                            | 0.26  | 0.32 | 31.7                             | 0.73 | 0.59 |
| Escuelas Aguirre      | Traffic        | 0.83 | 16.5                           | 23.7                            | 0.24  | 0.35 | 29.9                             | 0.63 | 0.54 |
| Pzs. Fedz Ladreda     | Traffic        | 0.80 | 22.1                           | 26.7                            | 0.34  | 0.41 | 33.4                             | 0.6  | 0.5  |

**Table S4. Model performance statistics (dimensionless unless noted otherwise) by station type and circulation pattern for ground-level O<sub>3</sub> concentration.**

| Station          | Pattern      | n    | FAC2 | MB<br>( $\mu\text{g m}^{-3}$ ) | MGE<br>( $\mu\text{g m}^{-3}$ ) | NMB   | NMGE | RMSE<br>( $\mu\text{g m}^{-3}$ ) | r    | IOA  |
|------------------|--------------|------|------|--------------------------------|---------------------------------|-------|------|----------------------------------|------|------|
| Rural            | Accumulation | 240  | 0.98 | -6.7                           | 15.29                           | -0.06 | 0.14 | 18.83                            | 0.83 | 0.66 |
|                  | Advection    | 232  | 0.98 | 3.1                            | 9.31                            | 0.04  | 0.11 | 12.97                            | 0.83 | 0.73 |
|                  | Other        | 3211 | 0.98 | -3.0                           | 14.01                           | -0.03 | 0.15 | 18.30                            | 0.75 | 0.67 |
| Suburban         | Accumulation | 474  | 0.96 | -4.8                           | 20.24                           | -0.05 | 0.20 | 26.69                            | 0.76 | 0.68 |
|                  | Advection    | 468  | 0.92 | 7.3                            | 13.59                           | 0.10  | 0.19 | 19.69                            | 0.75 | 0.68 |
|                  | Other        | 6412 | 0.94 | 2.6                            | 17.18                           | 0.03  | 0.20 | 23.22                            | 0.73 | 0.68 |
| Urban background | Accumulation | 669  | 0.89 | 2.4                            | 23.46                           | 0.03  | 0.26 | 31.04                            | 0.69 | 0.66 |
|                  | Advection    | 670  | 0.89 | 11.4                           | 16.95                           | 0.17  | 0.25 | 22.34                            | 0.72 | 0.60 |
|                  | Other        | 9014 | 0.89 | 8.5                            | 20.41                           | 0.11  | 0.25 | 27.08                            | 0.68 | 0.65 |
| Industrial       | Accumulation | 96   | 0.95 | 4.7                            | 16.40                           | 0.05  | 0.18 | 20.15                            | 0.86 | 0.73 |
|                  | Advection    | 96   | 0.97 | 9.1                            | 12.55                           | 0.13  | 0.18 | 15.26                            | 0.82 | 0.65 |
|                  | Other        | 1278 | 0.95 | 7.9                            | 14.54                           | 0.10  | 0.18 | 18.79                            | 0.83 | 0.71 |
| Urban traffic    | Accumulation | 510  | 0.91 | 3.5                            | 20.09                           | 0.04  | 0.22 | 25.81                            | 0.79 | 0.69 |
|                  | Advection    | 522  | 0.87 | 15.8                           | 18.22                           | 0.25  | 0.28 | 24.55                            | 0.69 | 0.55 |
|                  | Other        | 7086 | 0.87 | 11.0                           | 19.98                           | 0.14  | 0.25 | 26.72                            | 0.73 | 0.65 |

**Table S5. Model (WRF) performance statistics by circulation pattern for basic meteorological variables**

| Variable             | Pattern      | FAC2 | MB      | MGE     | NMB   | NMGE | r    | IOA  |
|----------------------|--------------|------|---------|---------|-------|------|------|------|
| Temperature<br>(T2)  | Accumulation | 1.00 | -1.4 K  | 2.0 K   | -0.05 | 0.07 | 0.92 | 0.81 |
|                      | Advection    | 1.00 | -0.5 K  | 1.5 K   | -0.02 | 0.06 | 0.96 | 0.86 |
|                      | Other        | 1.00 | -0.8 K  | 1.6 K   | -0.03 | 0.06 | 0.96 | 0.85 |
| Wind speed<br>(WS10) | Accumulation | 0.63 | 0.9 m/s | 1.7 m/s | 0.31  | 0.63 | 0.30 | 0.33 |
|                      | Advection    | 0.78 | 0.7 m/s | 1.5 m/s | 0.17  | 0.37 | 0.59 | 0.55 |
|                      | Other        | 0.71 | 0.5 m/s | 1.3 m/s | 0.18  | 0.46 | 0.58 | 0.55 |
| Wind<br>direction    | Accumulation | 0.61 | -34.3 ° | 90.7 °  | -0.24 | 0.63 | 0.26 | 0.55 |
|                      | Advection    | 0.87 | 6.5 °   | 34.5 °  | 0.05  | 0.25 | 0.79 | 0.81 |
|                      | Other        | 0.77 | -9.2 °  | 60.8 °  | -0.06 | 0.38 | 0.53 | 0.68 |



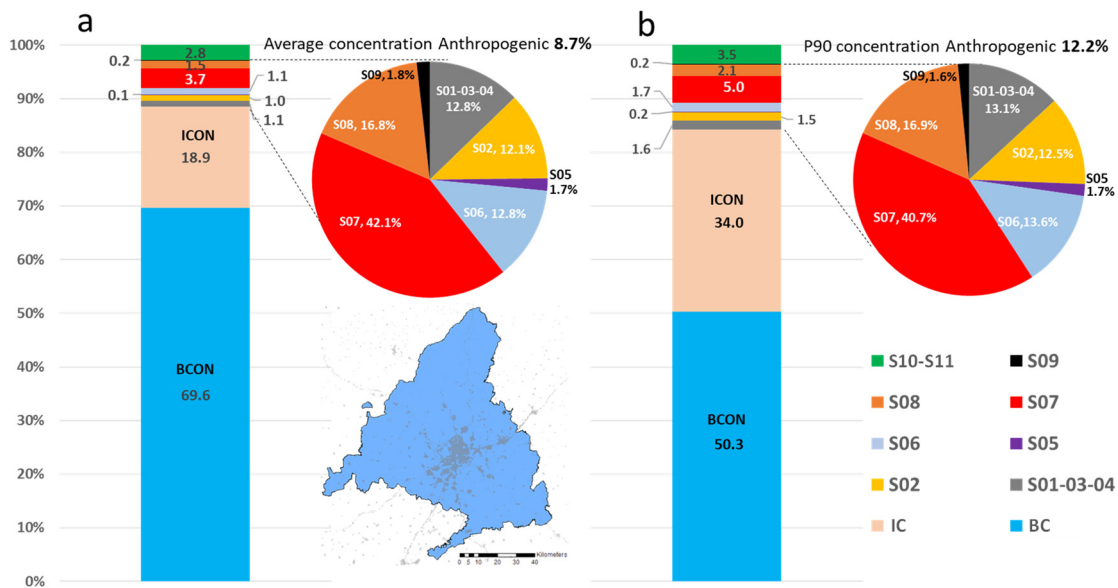

Figure S1. Spatially-averaged source apportionment (%) over the whole Madrid Region for (a) O<sub>3</sub> monthly mean and (b) 90<sup>th</sup> 1-hour percentile, including the sectoral breakdown within anthropogenic contributions.

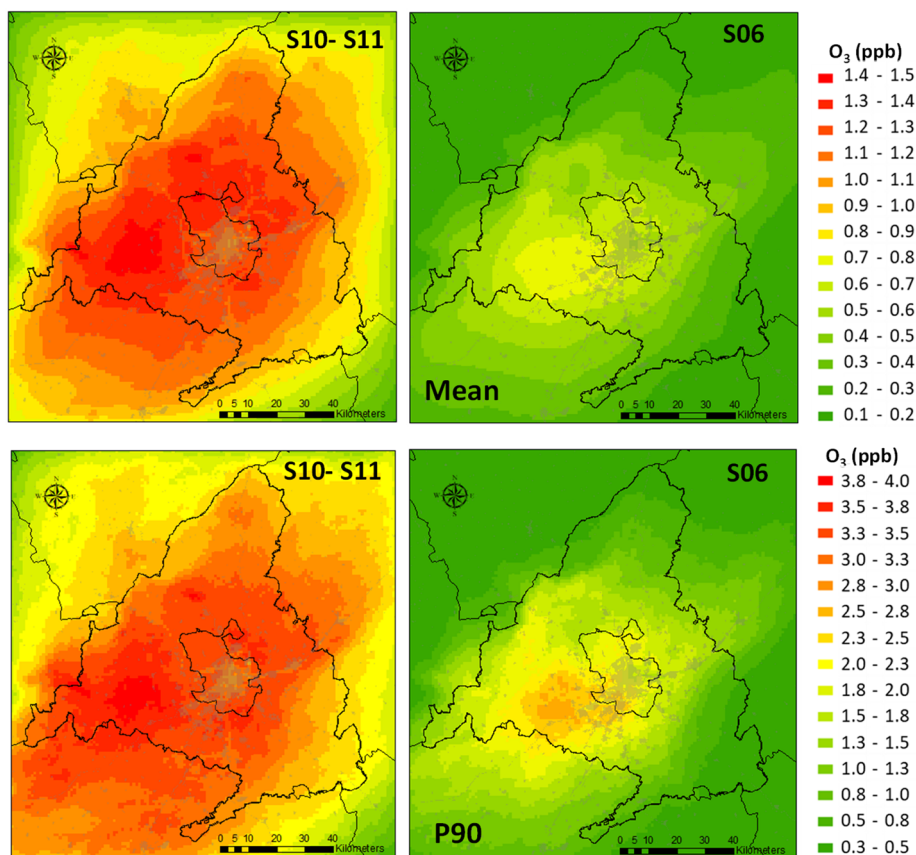

Figure S2. Absolute contribution (ppb) to the monthly mean 1-hour 90<sup>th</sup> O<sub>3</sub> percentile of the SNAP 06 sector (use of solvents and other products) and SNAP 10 and SNAP 11 (agriculture and nature) emissions.

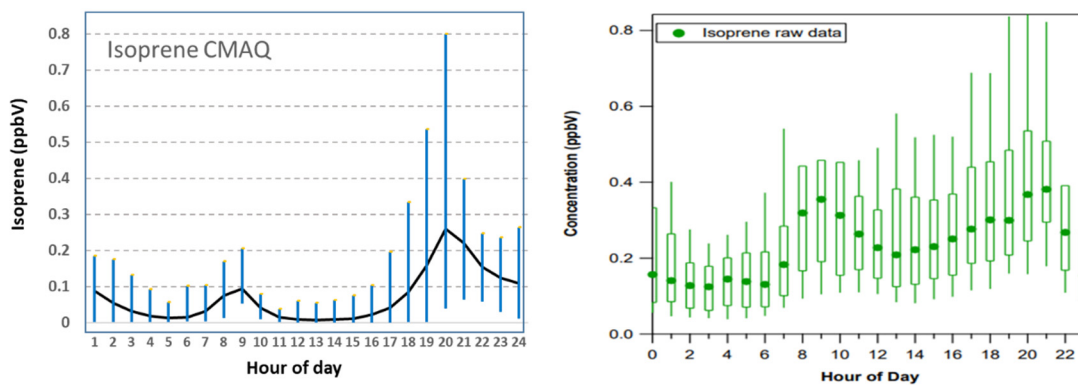

Figure S3. Comparison of isoprene ground-level mixing ratios predicted by CMAQ (left) and measurements made in Majadahonda (suburban site) by Querol et al., (2018) (right). Both graphs present the hourly values during the day averaged over the period July 5<sup>th</sup> and July 19<sup>th</sup>. The source of the right-hand panel is Pérez et al., (2016).

Reference:

- Pérez, N., A. Alastuey, C. Reche, M. Ealo, G. Titos, A. Ripoll, M.C. Minguillón, F. J. Gómez-Moreno, E. Alonso-Blanco, E. Coz, E. Díaz, B. Artiñano, S. García dos Santos, R. Fernández-Patier, A. Saiz-López, F. Serranía, M. Anguas-Ballesteros, B. TemimeRoussel, N. Marchand, D. C. S. Beddows, R. M. Harrison y X. Querol. Campaña intensiva de medidas de UFP, O<sub>3</sub> y sus precursores en el área de Madrid: medidas en superficie., [https://www.miteco.gob.es/content/dam/miteco/es/calidad-y-evaluacion-ambiental/temas/atmosfera-y-calidad-del-aire/anexo\\_informea33\\_madrid\\_tcm30-561368.pdf](https://www.miteco.gob.es/content/dam/miteco/es/calidad-y-evaluacion-ambiental/temas/atmosfera-y-calidad-del-aire/anexo_informea33_madrid_tcm30-561368.pdf) (last access: [January 22, 2024]), 2016.

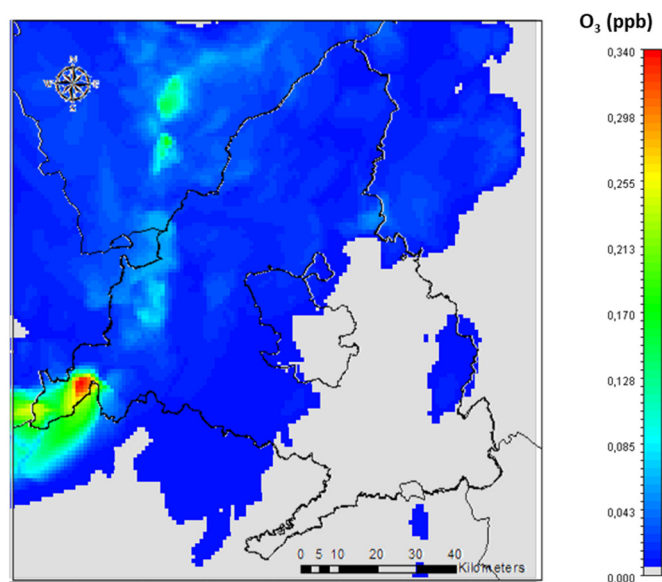

Figure S4. Maximum 1-hour attribution of stratospheric transport (ST) to ground-level O<sub>3</sub>.

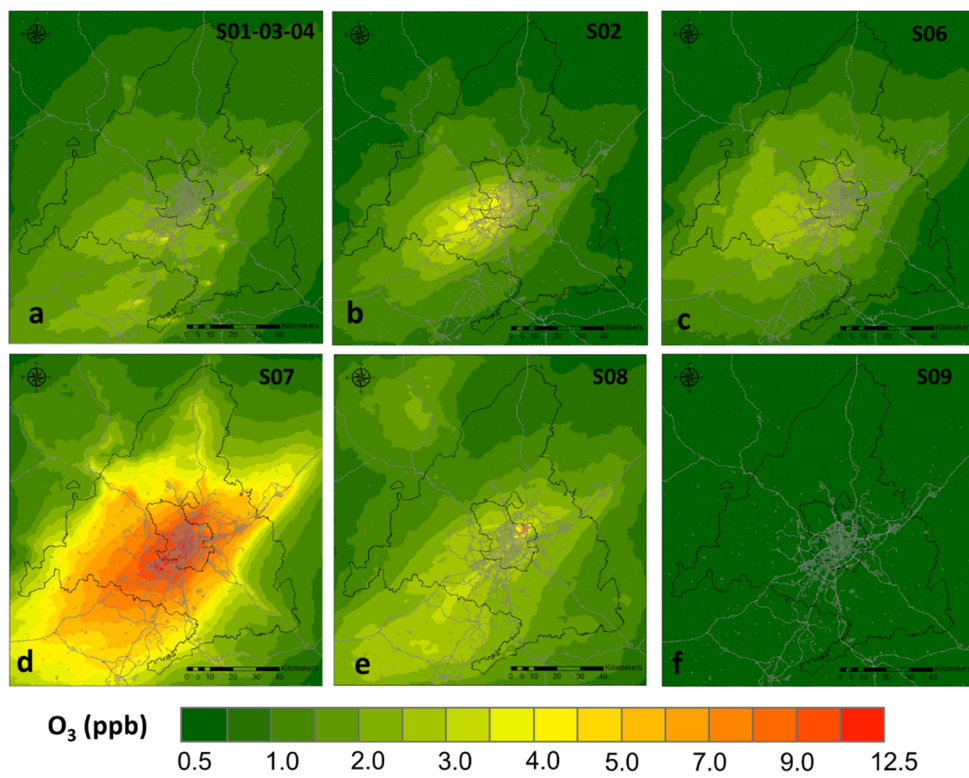

Figure S5. Absolute contribution to the 1-hour 90<sup>th</sup> O<sub>3</sub> percentile of the main emitting sectors.

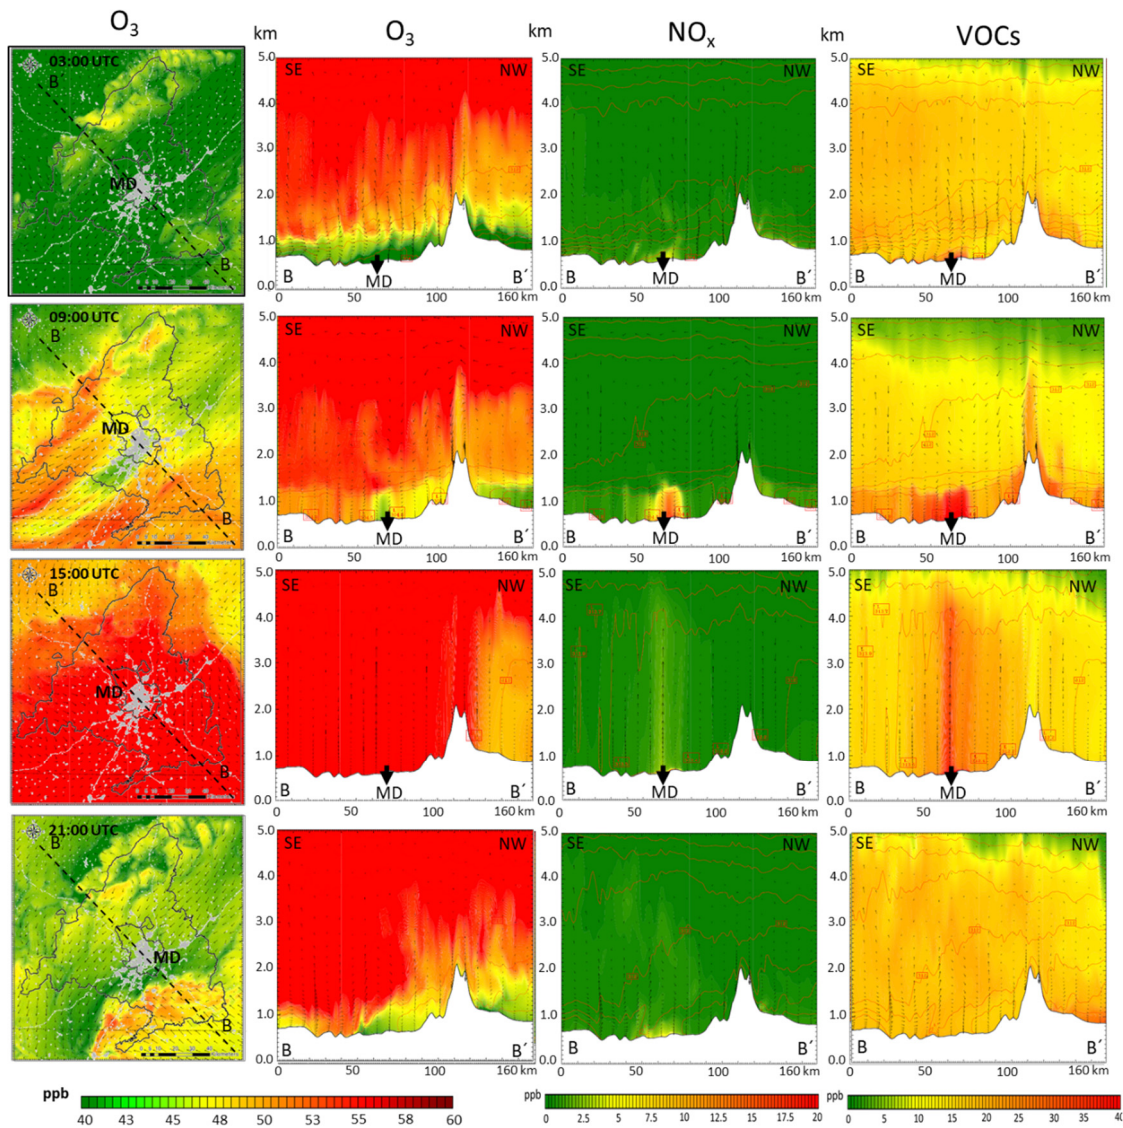

**Figure S6. Accumulation period: evolution during July 27<sup>th</sup>.** From left to right, plan view and SE-NW cross section (up to 5 km height) O<sub>3</sub> mixing ratios (ppb), NO<sub>x</sub> (ppb) and VOCs (ppb) at 3:00, 9:00; 15:00, 21: 00 UTC hours. MD = Madrid City.



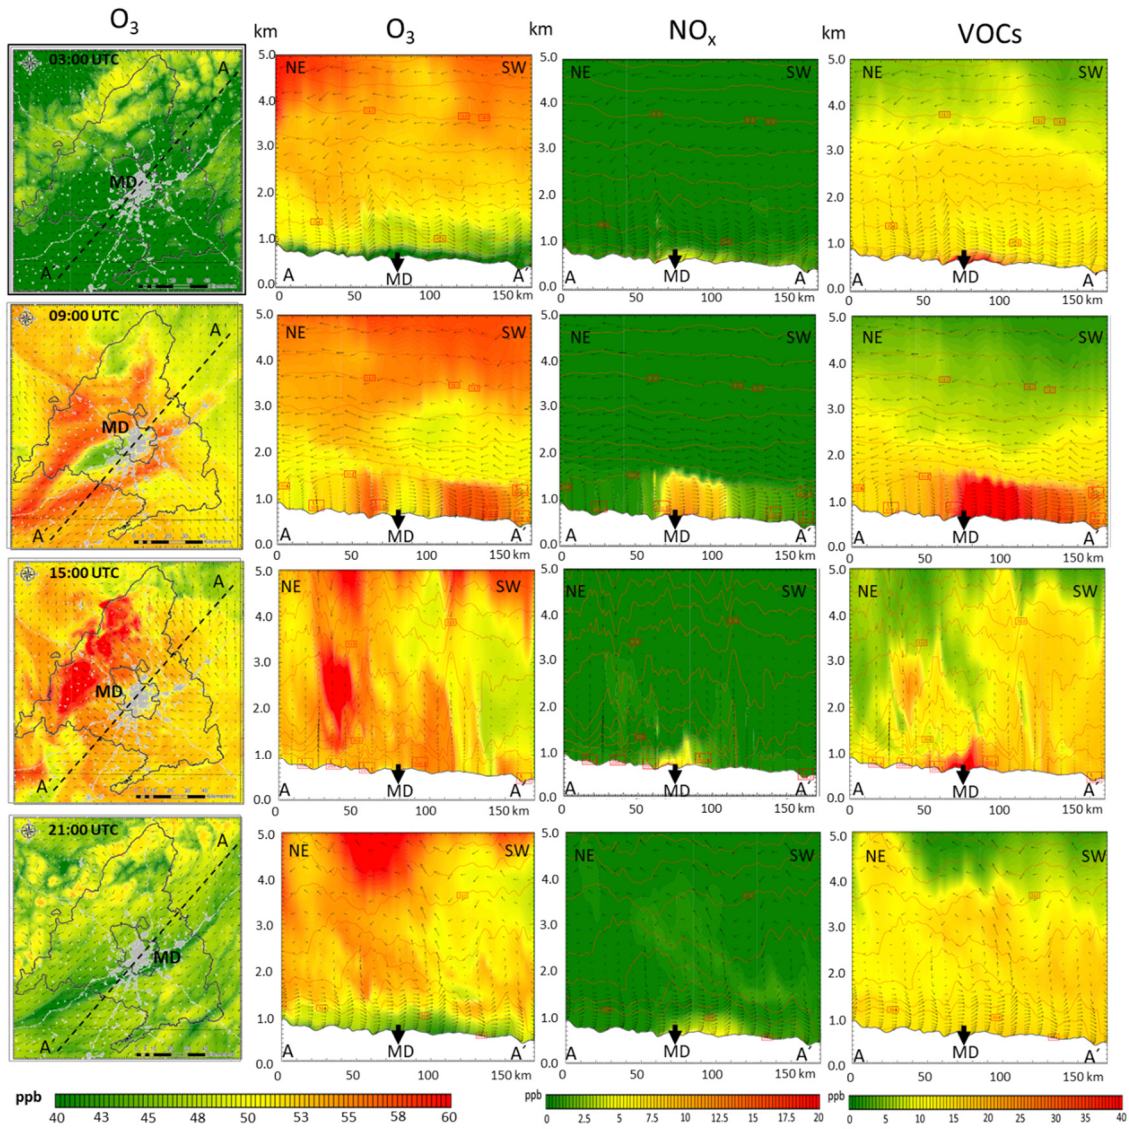

Figure S7. Accumulation period: evolution during July 6<sup>th</sup>. From left to right, plan view and NE-SW cross section (up to 5 km height) O<sub>3</sub> mixing ratios (ppb), NO<sub>x</sub> (ppb) and VOCs (ppb) at 3:00, 9:00; 15:00, 21: 00 UTC hours. MD = Madrid City.

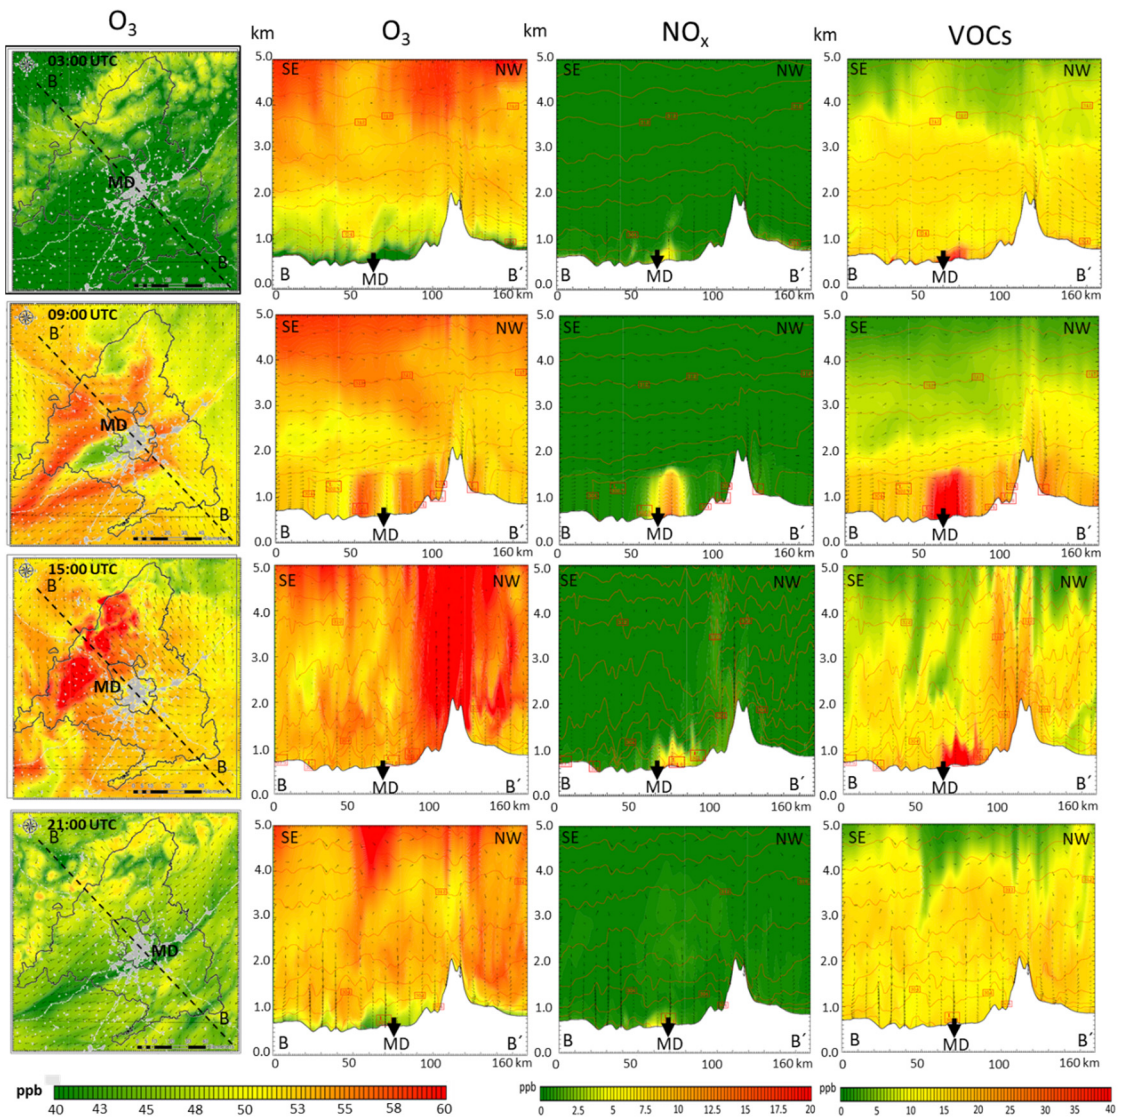

Figure S8. Accumulation period: evolution during July 6<sup>th</sup>. From left to right, plan view and SE-NW cross section (up to 5 km height)  $O_3$  mixing ratios (ppb),  $NO_x$  (ppb) and VOCs (ppb) at 3:00, 9:00; 15:00, 21: 00 UTC hours. MD = Madrid City.



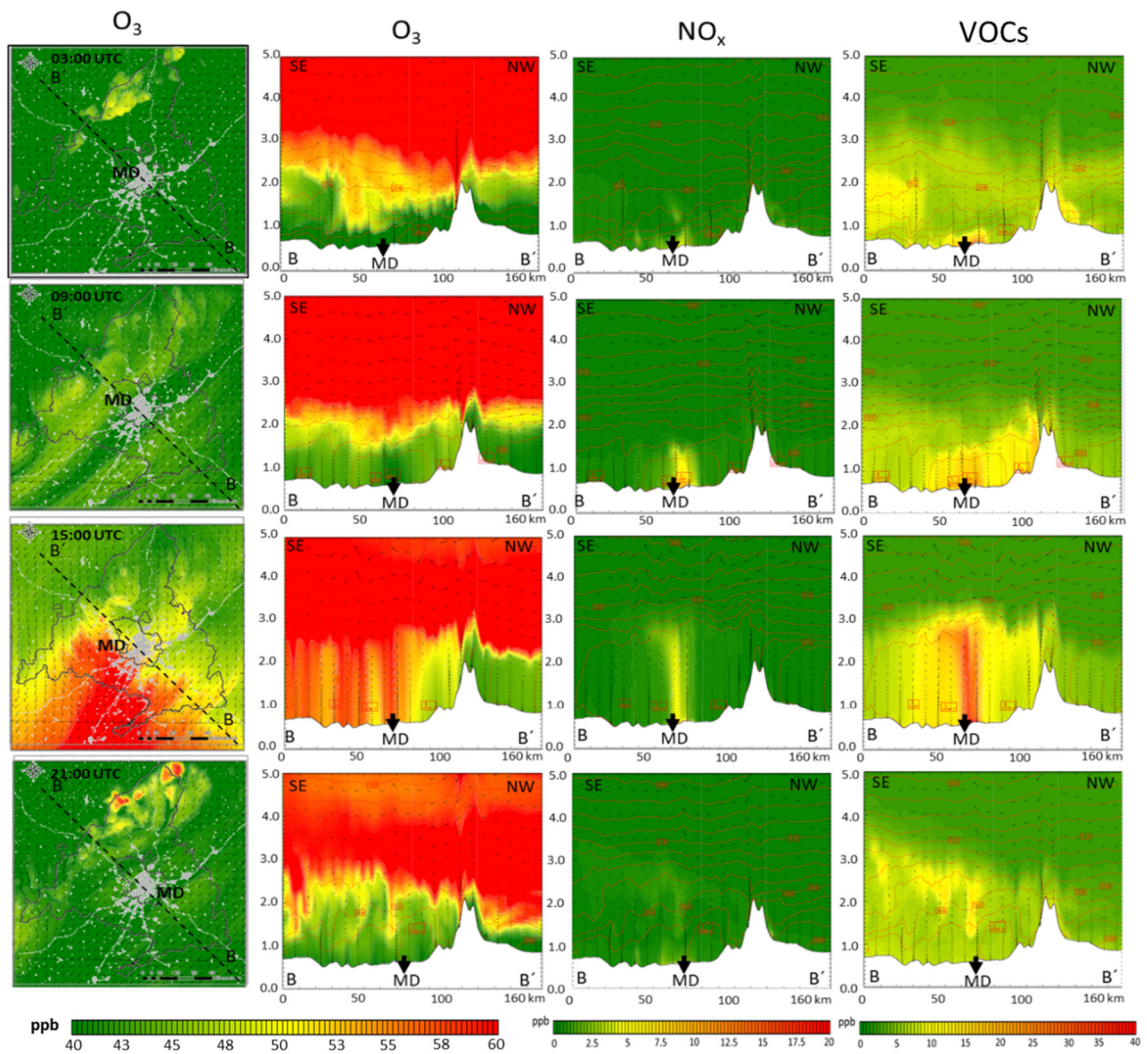

Figure S9. Advection period: evolution during July 13<sup>th</sup>. From left to right, plan view and SE-NW cross section (up to 5 km height) O<sub>3</sub> mixing ratios (ppb), NO<sub>x</sub> (ppb) and VOCs (ppb) at 3:00, 9:00, 15:00, 21: 00 UTC hours. MD = Madrid City.

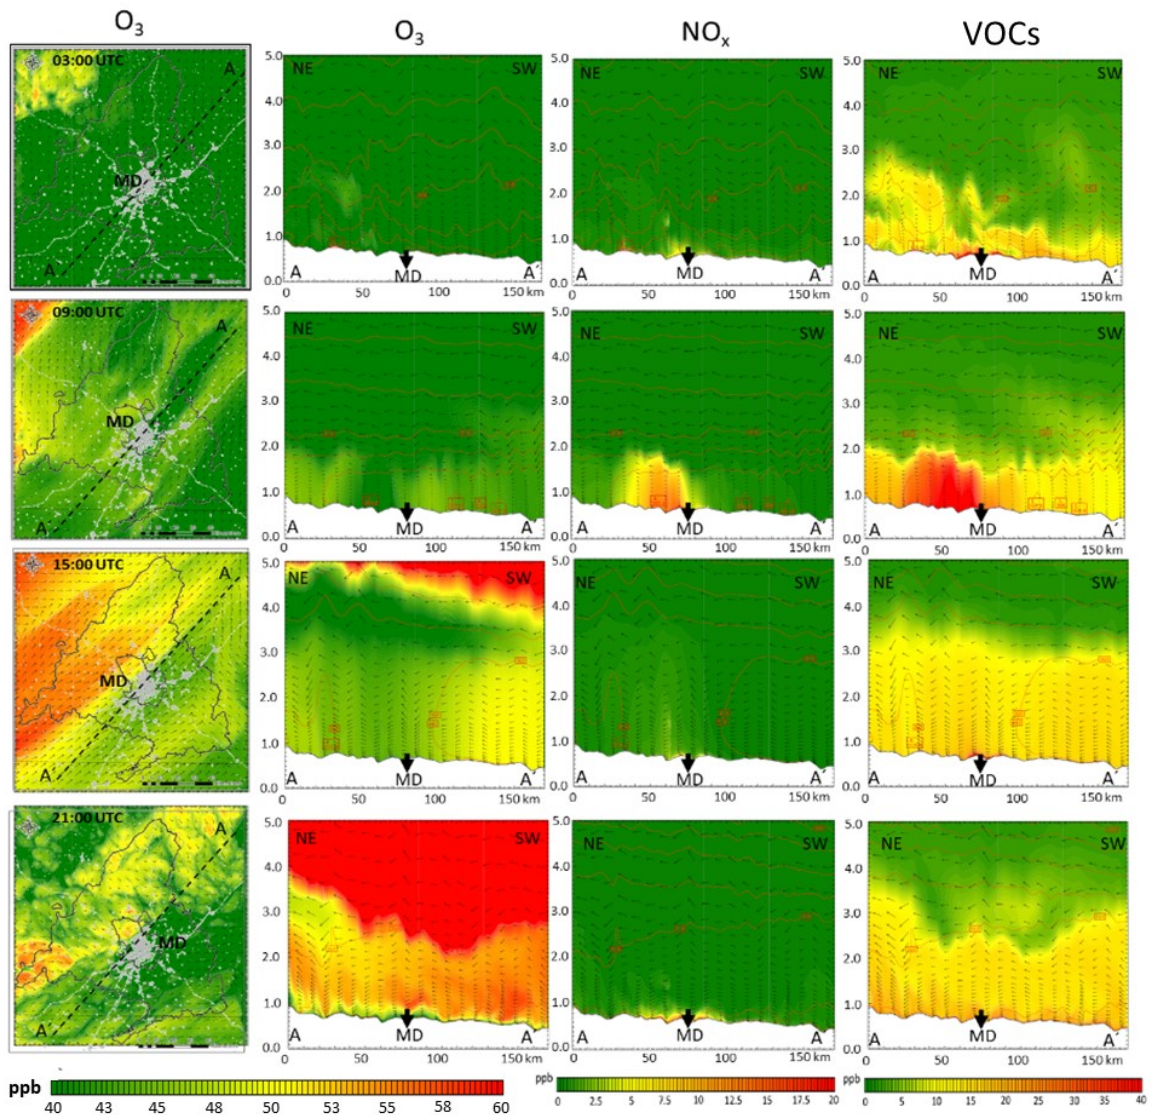

Figure S10. Advection period: evolution during July 20<sup>th</sup>. From left to right, plan view and NE-SW cross section (up to 5 km height)  $O_3$  mixing ratios (ppb),  $NO_x$  (ppb) and VOCs (ppb) at 3:00, 9:00; 15:00, 21: 00 UTC hours. MD = Madrid City.



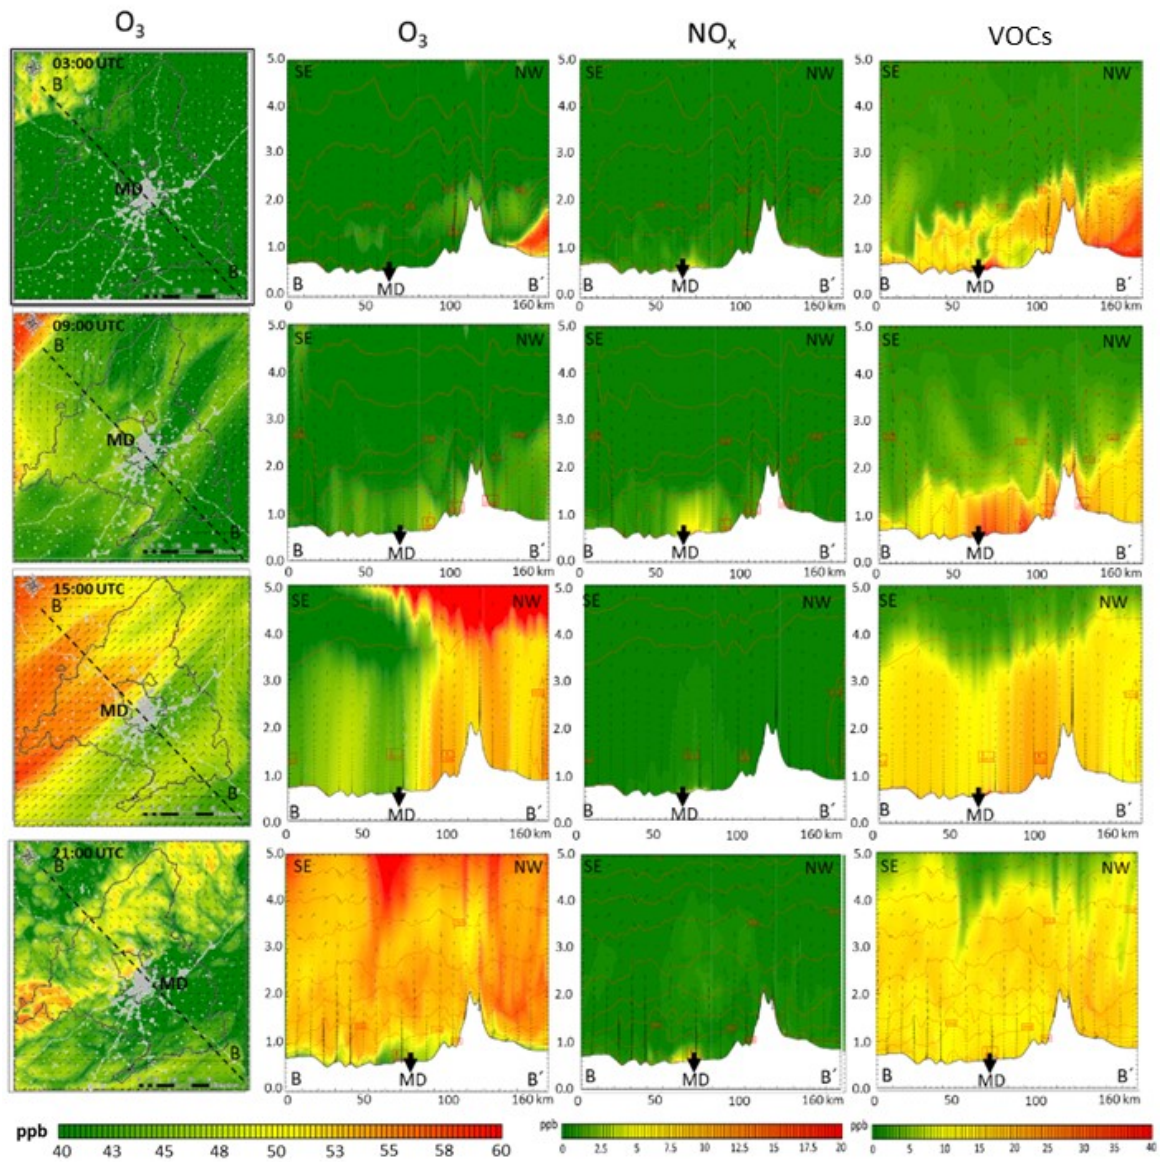

Figure S11. Advection period: evolution during July 20<sup>th</sup>. From left to right, plan view and SE-NW cross section (up to 5 km height)  $O_3$  mixing ratios (ppb),  $NO_x$  (ppb) and VOCs (ppb) at 3:00, 9:00; 15:00, 21: 00 UTC hours. MD = Madrid City.

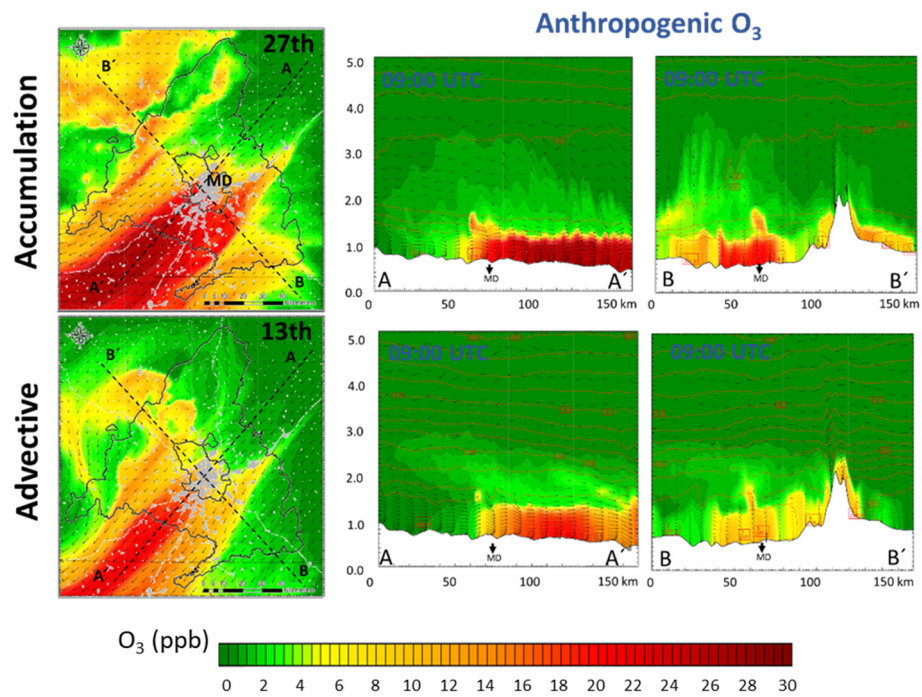

Figure S12. O<sub>3</sub> mixing ratios (ppb) at 09:00 UTC for July 27<sup>th</sup> (accumulation period) and July 13<sup>th</sup> (advective period). From left to right, plan view, NE-SW and SE-NW cross sections (up to 5 km height). MD = Madrid City.

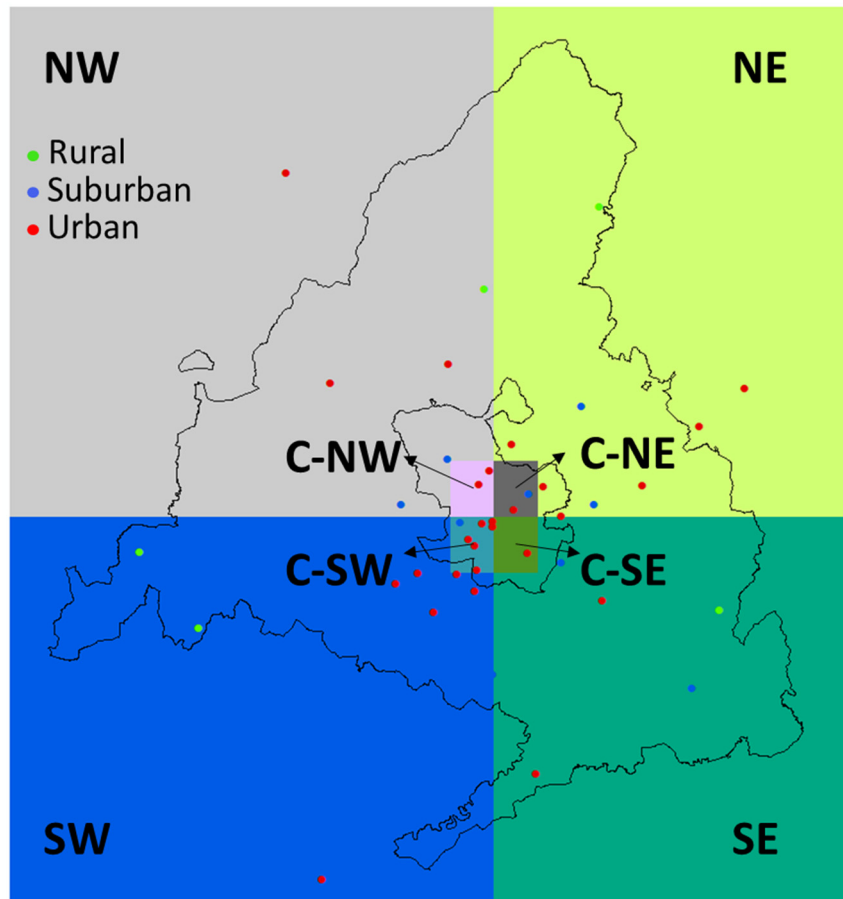

Figure S13. Geographical division (quadrants) of the study area for the analysis of individual monitoring station locations.

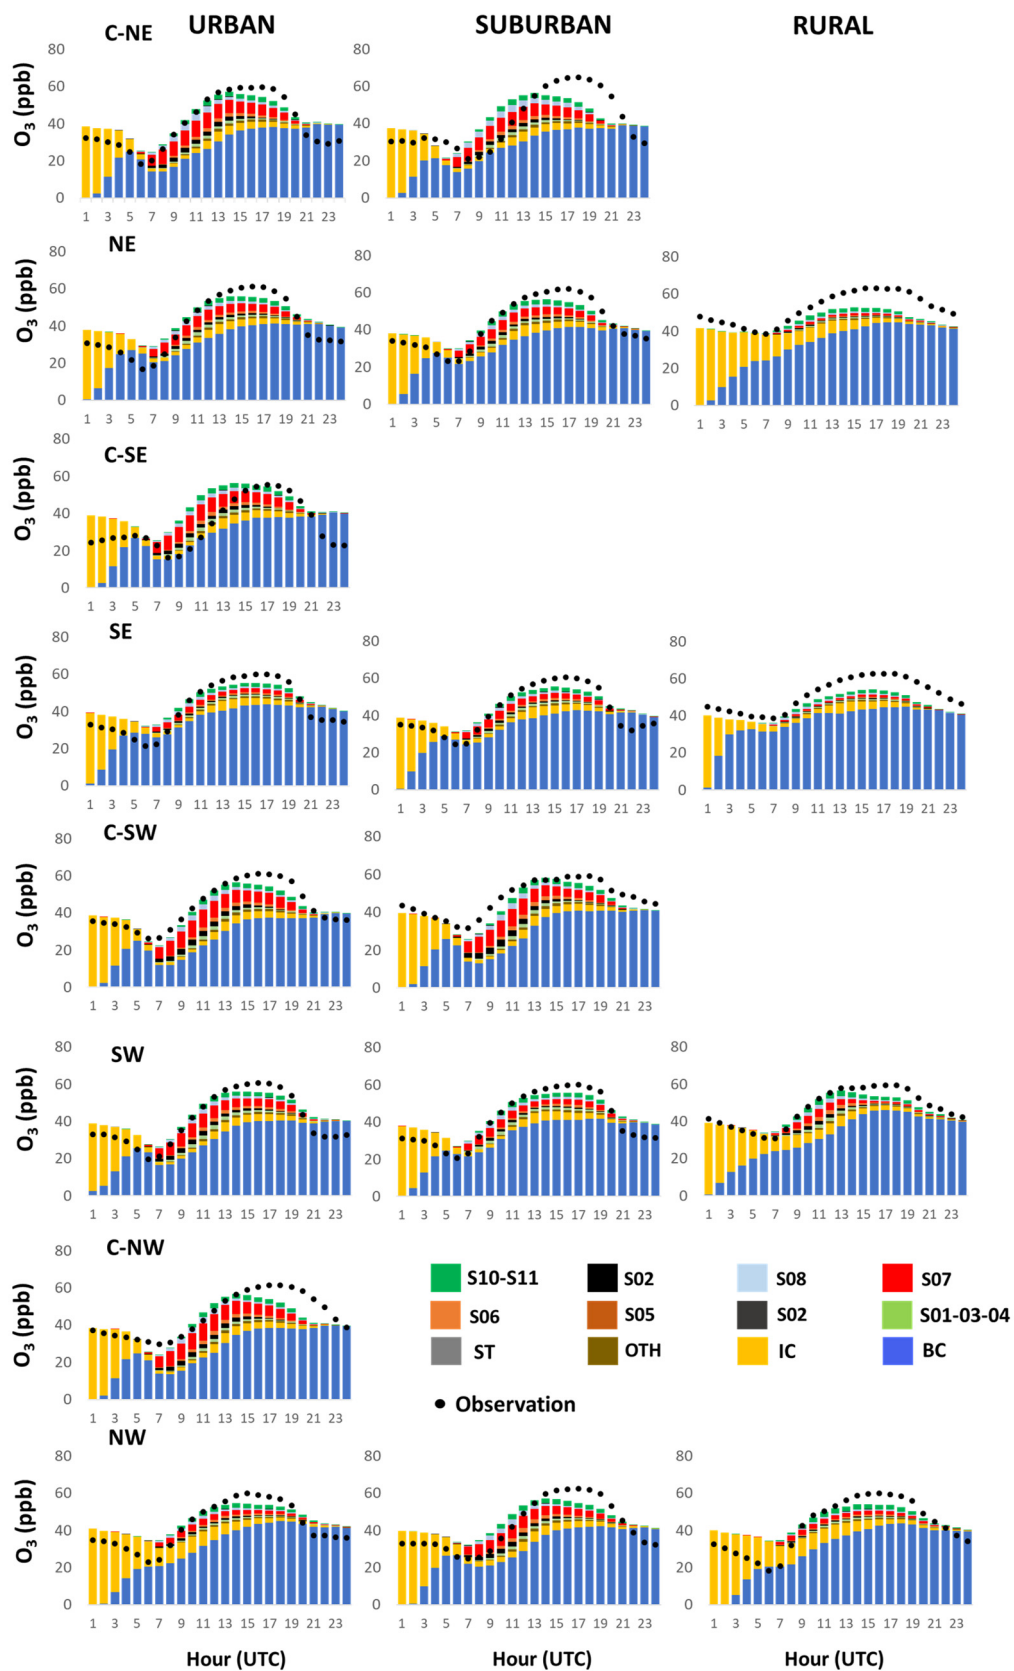

Figure S14. Hourly contribution to ground-level  $O_3$  (ppb) for the monthly average at the location of monitoring sites by geographical quadrant.

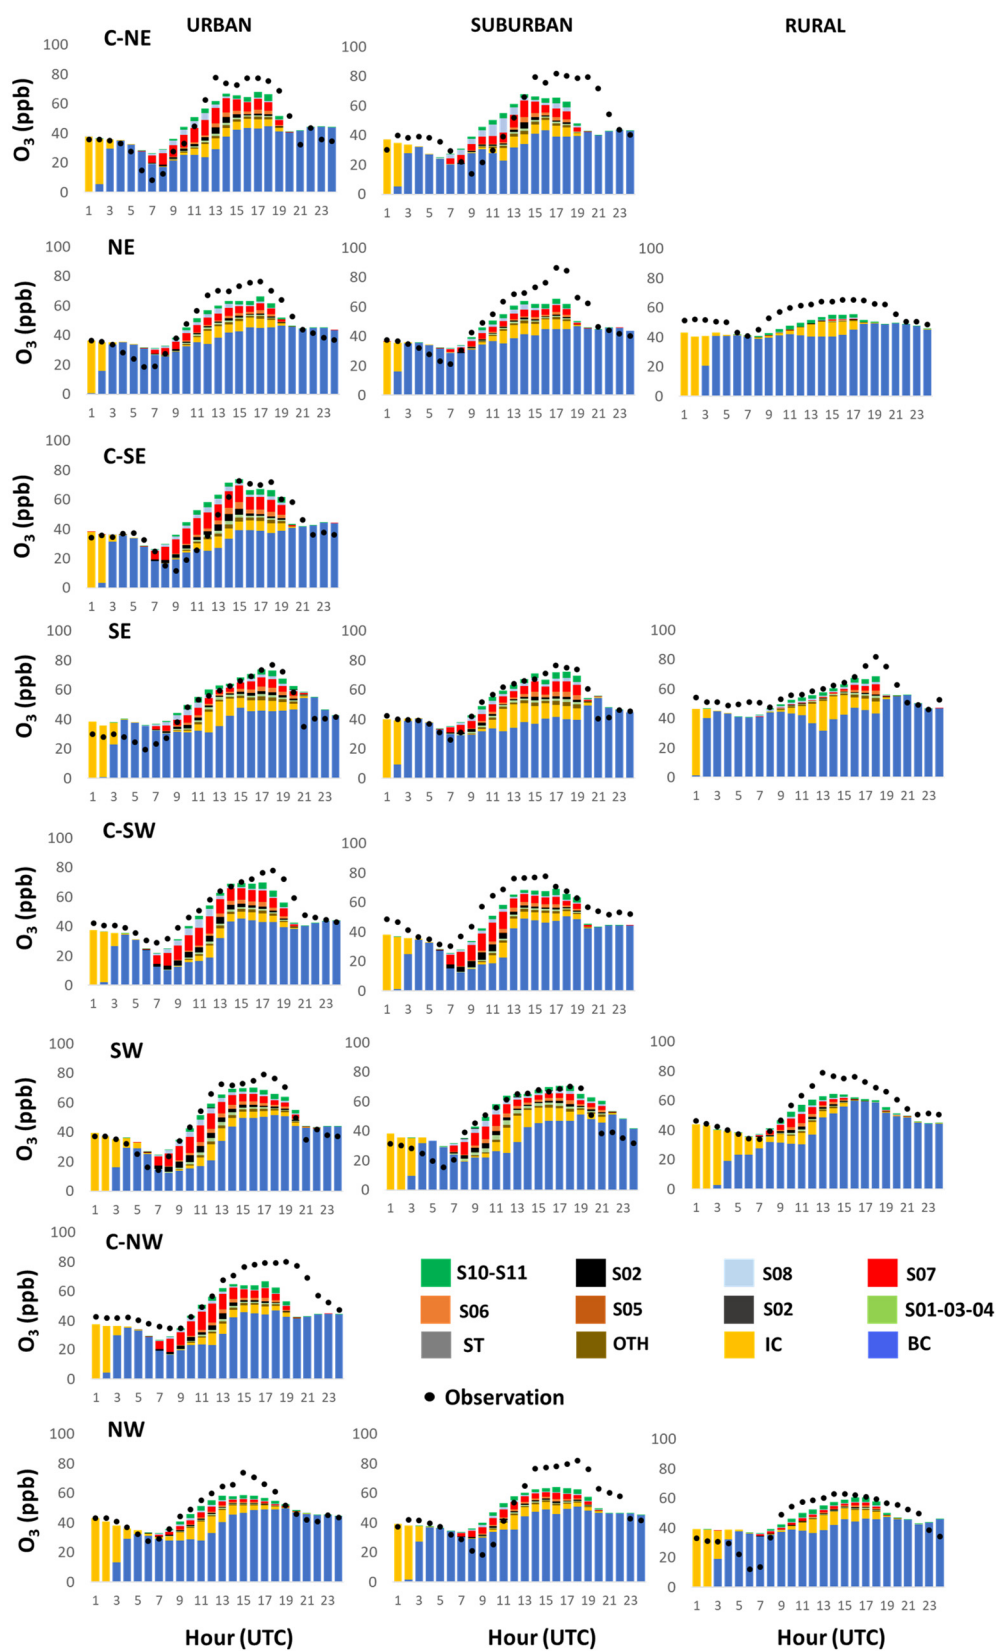

Figure S15. Hourly contribution to ground-level O<sub>3</sub> (ppb) for July 27<sup>th</sup>, 2016 at the location of monitoring sites by geographical quadrant.



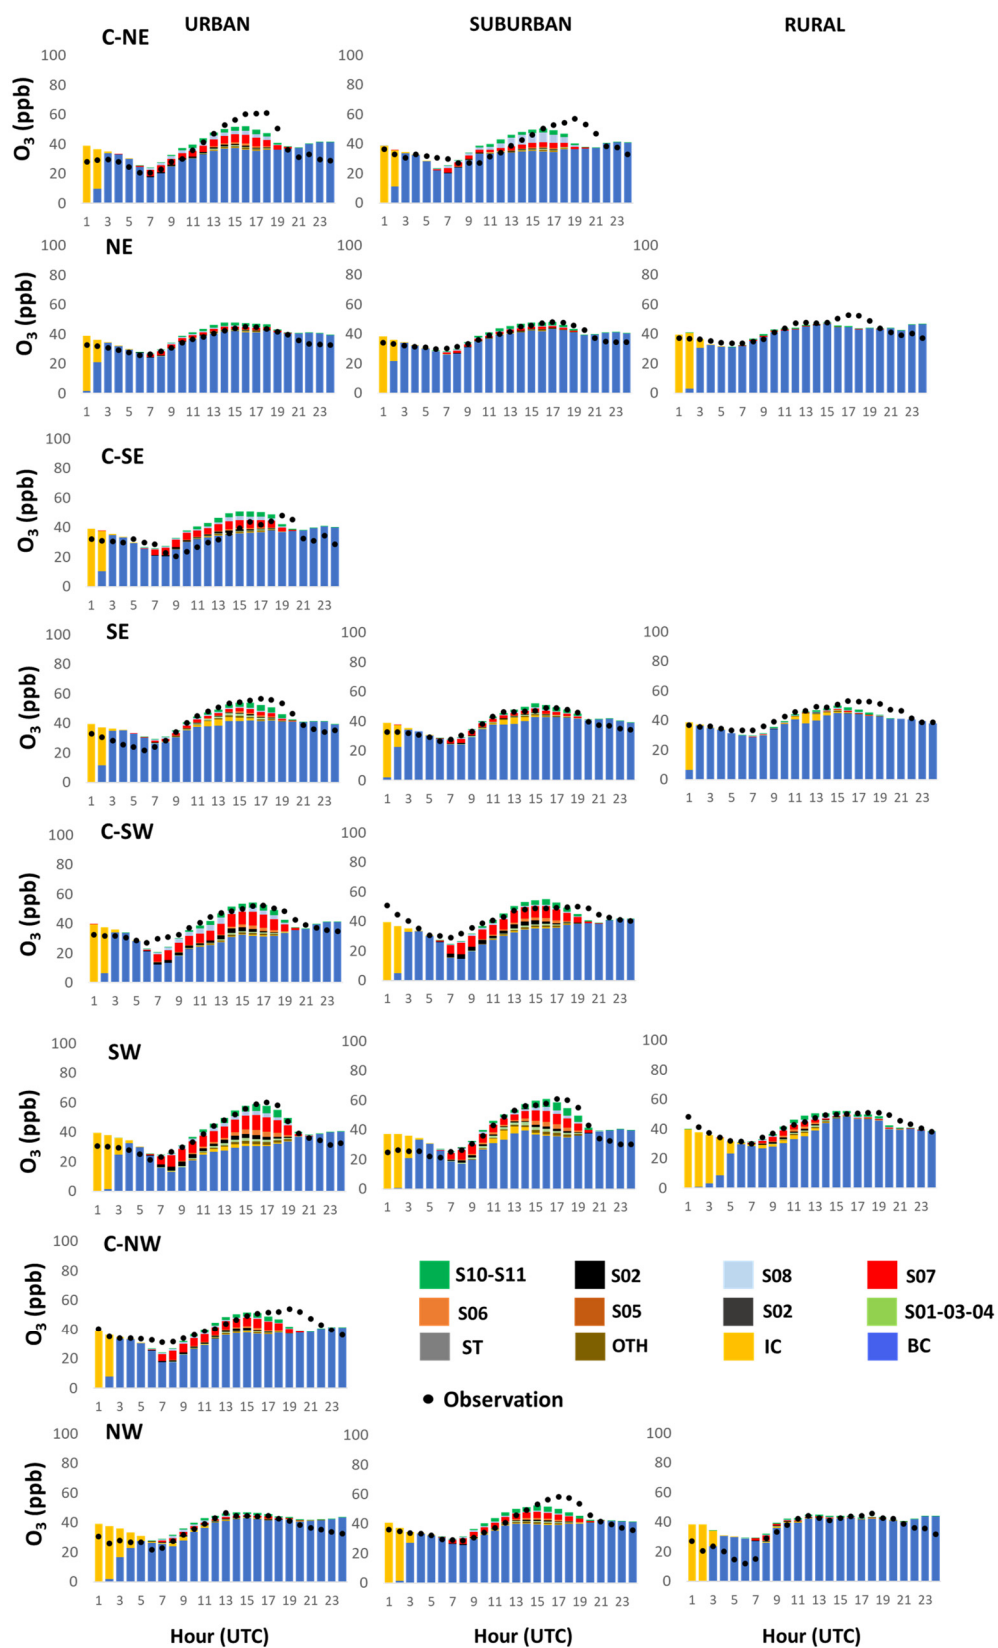

Figure S16. Hourly contribution to ground-level O<sub>3</sub> (ppb) for July 13<sup>th</sup>, 2016 at the location of monitoring sites by geographical quadrant.
